# Supplementary material for: Transcriptional and Post-Transcriptional Regulation and Transcriptional Memory of Chromatin Regulators in Response to Low Temperature
Source: Front Plant Sci. 2020 Feb 7;11:39. doi: 10.3389/fpls.2020.00039 (PMC7020257; doi:10.3389/fpls.2020.00039)
Supplement: Supplementary file 6 [file Table_5.xlsx]

## Sheet: DE
Supplemental Table 5: Genes induced or repressed during cold exposure (DE), based on published data (Calixto et al., 2018)
7302
AT1G01010
AT1G01060
AT1G01120
AT1G01140
AT1G01170
AT1G01180
AT1G01190
AT1G01200
AT1G01240
AT1G01250
AT1G01340
AT1G01360
AT1G01390
AT1G01420
AT1G01430
AT1G01448
AT1G01470
AT1G01490
AT1G01500
AT1G01520
AT1G01560
AT1G01570
AT1G01580
AT1G01590
AT1G01620
AT1G01680
AT1G01720
AT1G01770
AT1G01780
AT1G01840
AT1G01940
AT1G02065
AT1G02180
AT1G02205
AT1G02270
AT1G02300
AT1G02305
AT1G02310
AT1G02370
AT1G02390
AT1G02400
AT1G02405
AT1G02440
AT1G02450
AT1G02460
AT1G02470
AT1G02500
AT1G02630
AT1G02640
AT1G02650
AT1G02660
AT1G02670
AT1G02700
AT1G02705
AT1G02780
AT1G02800
AT1G02820
AT1G02870
AT1G02920
AT1G02930
AT1G02940
AT1G02960
AT1G03010
AT1G03020
AT1G03030
AT1G03055
AT1G03070
AT1G03090
AT1G03100
AT1G03110
AT1G03130
AT1G03200
AT1G03210
AT1G03220
AT1G03230
AT1G03250
AT1G03290
AT1G03300
AT1G03310
AT1G03340
AT1G03360
AT1G03370
AT1G03400
AT1G03410
AT1G03420
AT1G03457
AT1G03470
AT1G03495
AT1G03510
AT1G03530
AT1G03545
AT1G03600
AT1G03610
AT1G03620
AT1G03630
AT1G03650
AT1G03660
AT1G03850
AT1G03860
AT1G03905
AT1G03920
AT1G03935
AT1G03940
AT1G04040
AT1G04110
AT1G04130
AT1G04170
AT1G04220
AT1G04240
AT1G04250
AT1G04270
AT1G04280
AT1G04350
AT1G04360
AT1G04430
AT1G04480
AT1G04520
AT1G04570
AT1G04620
AT1G04635
AT1G04730
AT1G04770
AT1G04800
AT1G04840
AT1G04870
AT1G04900
AT1G04945
AT1G04980
AT1G05000
AT1G05010
AT1G05020
AT1G05060
AT1G05100
AT1G05135
AT1G05170
AT1G05310
AT1G05320
AT1G05540
AT1G05550
AT1G05560
AT1G05562
AT1G05570
AT1G05630
AT1G05640
AT1G05675
AT1G05730
AT1G05760
AT1G05783
AT1G05810
AT1G05870
AT1G05894
AT1G05910
AT1G05970
AT1G06000
AT1G06002
AT1G06040
AT1G06110
AT1G06140
AT1G06160
AT1G06220
AT1G06265
AT1G06290
AT1G06350
AT1G06370
AT1G06380
AT1G06420
AT1G06430
AT1G06440
AT1G06460
AT1G06475
AT1G06520
AT1G06540
AT1G06550
AT1G06570
AT1G06620
AT1G06630
AT1G06640
AT1G06645
AT1G06660
AT1G06670
AT1G06680
AT1G06690
AT1G06720
AT1G06780
AT1G06950
AT1G07000
AT1G07070
AT1G07135
AT1G07150
AT1G07180
AT1G07230
AT1G07240
AT1G07350
AT1G07360
AT1G07390
AT1G07420
AT1G07430
AT1G07440
AT1G07450
AT1G07500
AT1G07570
AT1G07620
AT1G07640
AT1G07720
AT1G07740
AT1G07840
AT1G07890
AT1G07900
AT1G07920
AT1G07930
AT1G07940
AT1G07985
AT1G08070
AT1G08130
AT1G08165
AT1G08180
AT1G08200
AT1G08220
AT1G08230
AT1G08300
AT1G08340
AT1G08350
AT1G08360
AT1G08380
AT1G08390
AT1G08410
AT1G08450
AT1G08460
AT1G08500
AT1G08570
AT1G08580
AT1G08590
AT1G08610
AT1G08630
AT1G08730
AT1G08840
AT1G08890
AT1G08900
AT1G08920
AT1G08940
AT1G08980
AT1G09010
AT1G09080
AT1G09140
AT1G09180
AT1G09190
AT1G09200
AT1G09220
AT1G09240
AT1G09350
AT1G09390
AT1G09415
AT1G09530
AT1G09560
AT1G09590
AT1G09600
AT1G09610
AT1G09680
AT1G09690
AT1G09710
AT1G09740
AT1G09750
AT1G09780
AT1G09810
AT1G09830
AT1G09890
AT1G09900
AT1G09932
AT1G09940
AT1G09950
AT1G10020
AT1G10040
AT1G10050
AT1G10060
AT1G10070
AT1G10090
AT1G10150
AT1G10155
AT1G10160
AT1G10240
AT1G10270
AT1G10340
AT1G10360
AT1G10370
AT1G10410
AT1G10417
AT1G10490
AT1G10522
AT1G10550
AT1G10560
AT1G10580
AT1G10585
AT1G10600
AT1G10610
AT1G10650
AT1G10657
AT1G10660
AT1G10682
AT1G10700
AT1G10760
AT1G10840
AT1G10900
AT1G10920
AT1G10930
AT1G10960
AT1G10990
AT1G11000
AT1G11070
AT1G11080
AT1G11125
AT1G11175
AT1G11180
AT1G11190
AT1G11210
AT1G11220
AT1G11260
AT1G11270
AT1G11300
AT1G11310
AT1G11320
AT1G11330
AT1G11340
AT1G11360
AT1G11390
AT1G11475
AT1G11720
AT1G11730
AT1G11735
AT1G11740
AT1G11785
AT1G11800
AT1G11840
AT1G11850
AT1G11960
AT1G12010
AT1G12080
AT1G12090
AT1G12110
AT1G12160
AT1G12220
AT1G12230
AT1G12240
AT1G12244
AT1G12250
AT1G12370
AT1G12420
AT1G12650
AT1G12672
AT1G12710
AT1G12730
AT1G12770
AT1G12780
AT1G12790
AT1G12950
AT1G13030
AT1G13080
AT1G13090
AT1G13110
AT1G13140
AT1G13145
AT1G13150
AT1G13160
AT1G13210
AT1G13245
AT1G13260
AT1G13270
AT1G13280
AT1G13330
AT1G13340
AT1G13370
AT1G13410
AT1G13420
AT1G13430
AT1G13448
AT1G13470
AT1G13520
AT1G13560
AT1G13570
AT1G13650
AT1G13700
AT1G13730
AT1G13740
AT1G13750
AT1G13800
AT1G13810
AT1G13820
AT1G13830
AT1G13870
AT1G13930
AT1G13990
AT1G14030
AT1G14060
AT1G14100
AT1G14120
AT1G14170
AT1G14200
AT1G14205
AT1G14240
AT1G14250
AT1G14300
AT1G14320
AT1G14350
AT1G14360
AT1G14410
AT1G14430
AT1G14440
AT1G14455
AT1G14470
AT1G14490
AT1G14518
AT1G14580
AT1G14620
AT1G14640
AT1G14680
AT1G14700
AT1G14750
AT1G14780
AT1G14790
AT1G14850
AT1G14880
AT1G14890
AT1G14900
AT1G14920
AT1G14980
AT1G15000
AT1G15010
AT1G15020
AT1G15080
AT1G15100
AT1G15125
AT1G15150
AT1G15175
AT1G15180
AT1G15190
AT1G15215
AT1G15250
AT1G15290
AT1G15310
AT1G15400
AT1G15405
AT1G15410
AT1G15420
AT1G15440
AT1G15480
AT1G15510
AT1G15550
AT1G15570
AT1G15580
AT1G15660
AT1G15670
AT1G15690
AT1G15740
AT1G15760
AT1G15790
AT1G15800
AT1G15820
AT1G15825
AT1G15830
AT1G15870
AT1G15885
AT1G15890
AT1G15920
AT1G15930
AT1G15950
AT1G15960
AT1G16000
AT1G16090
AT1G16110
AT1G16130
AT1G16260
AT1G16280
AT1G16300
AT1G16340
AT1G16360
AT1G16400
AT1G16410
AT1G16420
AT1G16445
AT1G16480
AT1G16490
AT1G16510
AT1G16515
AT1G16570
AT1G16590
AT1G16635
AT1G16650
AT1G16670
AT1G16705
AT1G16720
AT1G16730
AT1G16780
AT1G16820
AT1G16830
AT1G16850
AT1G17020
AT1G17050
AT1G17060
AT1G17090
AT1G17100
AT1G17120
AT1G17147
AT1G17170
AT1G17200
AT1G17240
AT1G17260
AT1G17340
AT1G17420
AT1G17430
AT1G17460
AT1G17600
AT1G17610
AT1G17630
AT1G17640
AT1G17665
AT1G17850
AT1G17860
AT1G17870
AT1G17880
AT1G17970
AT1G17990
AT1G18000
AT1G18020
AT1G18075
AT1G18080
AT1G18090
AT1G18100
AT1G18140
AT1G18150
AT1G18170
AT1G18180
AT1G18200
AT1G18265
AT1G18300
AT1G18320
AT1G18330
AT1G18360
AT1G18390
AT1G18400
AT1G18410
AT1G18415
AT1G18460
AT1G18485
AT1G18540
AT1G18570
AT1G18590
AT1G18620
AT1G18630
AT1G18650
AT1G18660
AT1G18680
AT1G18710
AT1G18750
AT1G18773
AT1G18800
AT1G18810
AT1G18850
AT1G18880
AT1G18900
AT1G18940
AT1G19000
AT1G19140
AT1G19150
AT1G19180
AT1G19190
AT1G19200
AT1G19210
AT1G19250
AT1G19300
AT1G19350
AT1G19370
AT1G19380
AT1G19394
AT1G19396
AT1G19397
AT1G19415
AT1G19440
AT1G19450
AT1G19490
AT1G19510
AT1G19520
AT1G19540
AT1G19565
AT1G19570
AT1G19620
AT1G19640
AT1G19650
AT1G19660
AT1G19670
AT1G19680
AT1G19690
AT1G19720
AT1G19770
AT1G19830
AT1G19840
AT1G19860
AT1G19960
AT1G19990
AT1G20015
AT1G20030
AT1G20070
AT1G20100
AT1G20300
AT1G20340
AT1G20350
AT1G20390
AT1G20440
AT1G20450
AT1G20470
AT1G20480
AT1G20510
AT1G20515
AT1G20540
AT1G20560
AT1G20620
AT1G20693
AT1G20696
AT1G20720
AT1G20780
AT1G20850
AT1G20910
AT1G20950
AT1G21050
AT1G21100
AT1G21110
AT1G21120
AT1G21140
AT1G21150
AT1G21210
AT1G21240
AT1G21250
AT1G21270
AT1G21310
AT1G21350
AT1G21400
AT1G21440
AT1G21460
AT1G21500
AT1G21520
AT1G21540
AT1G21550
AT1G21560
AT1G21600
AT1G21650
AT1G21680
AT1G21690
AT1G21770
AT1G21790
AT1G21840
AT1G21910
AT1G21980
AT1G22070
AT1G22160
AT1G22250
AT1G22270
AT1G22330
AT1G22340
AT1G22360
AT1G22370
AT1G22380
AT1G22400
AT1G22410
AT1G22430
AT1G22470
AT1G22500
AT1G22540
AT1G22550
AT1G22570
AT1G22650
AT1G22690
AT1G22770
AT1G22780
AT1G22890
AT1G22950
AT1G22985
AT1G23000
AT1G23010
AT1G23020
AT1G23050
AT1G23060
AT1G23080
AT1G23090
AT1G23100
AT1G23120
AT1G23130
AT1G23140
AT1G23190
AT1G23200
AT1G23280
AT1G23290
AT1G23310
AT1G23390
AT1G23400
AT1G23410
AT1G23470
AT1G23480
AT1G23550
AT1G23730
AT1G23740
AT1G23750
AT1G23800
AT1G23840
AT1G23850
AT1G23870
AT1G23965
AT1G24070
AT1G24090
AT1G24100
AT1G24140
AT1G24145
AT1G24147
AT1G24148
AT1G24150
AT1G24265
AT1G24280
AT1G24310
AT1G24330
AT1G24470
AT1G24510
AT1G24530
AT1G24575
AT1G24580
AT1G24600
AT1G24735
AT1G24792
AT1G24793
AT1G24825
AT1G24880
AT1G25053
AT1G25055
AT1G25098
AT1G25145
AT1G25175
AT1G25180
AT1G25209
AT1G25211
AT1G25230
AT1G25250
AT1G25260
AT1G25275
AT1G25277
AT1G25360
AT1G25400
AT1G25422
AT1G25430
AT1G25440
AT1G25520
AT1G25580
AT1G26100
AT1G26150
AT1G26220
AT1G26230
AT1G26340
AT1G26420
AT1G26440
AT1G26500
AT1G26520
AT1G26530
AT1G26558
AT1G26560
AT1G26580
AT1G26660
AT1G26665
AT1G26670
AT1G26690
AT1G26730
AT1G26770
AT1G26790
AT1G26800
AT1G26840
AT1G26880
AT1G26910
AT1G26920
AT1G26930
AT1G26960
AT1G27020
AT1G27045
AT1G27110
AT1G27150
AT1G27170
AT1G27200
AT1G27210
AT1G27285
AT1G27290
AT1G27390
AT1G27400
AT1G27410
AT1G27420
AT1G27470
AT1G27540
AT1G27590
AT1G27630
AT1G27680
AT1G27730
AT1G27760
AT1G27910
AT1G27921
AT1G27930
AT1G27950
AT1G28010
AT1G28070
AT1G28100
AT1G28210
AT1G28230
AT1G28260
AT1G28330
AT1G28350
AT1G28370
AT1G28395
AT1G28480
AT1G28580
AT1G28600
AT1G28610
AT1G28620
AT1G28660
AT1G28670
AT1G28690
AT1G28960
AT1G29030
AT1G29195
AT1G29200
AT1G29240
AT1G29250
AT1G29260
AT1G29270
AT1G29280
AT1G29320
AT1G29357
AT1G29380
AT1G29390
AT1G29395
AT1G29400
AT1G29410
AT1G29420
AT1G29440
AT1G29450
AT1G29460
AT1G29500
AT1G29600
AT1G29630
AT1G29640
AT1G29660
AT1G29715
AT1G29730
AT1G29770
AT1G29780
AT1G29820
AT1G29910
AT1G29920
AT1G29930
AT1G29940
AT1G29951
AT1G29965
AT1G30070
AT1G30100
AT1G30200
AT1G30240
AT1G30260
AT1G30282
AT1G30360
AT1G30380
AT1G30420
AT1G30500
AT1G30515
AT1G30520
AT1G30545
AT1G30620
AT1G30640
AT1G30680
AT1G30690
AT1G30757
AT1G30820
AT1G30840
AT1G30900
AT1G30910
AT1G30960
AT1G31010
AT1G31040
AT1G31170
AT1G31173
AT1G31180
AT1G31310
AT1G31330
AT1G31335
AT1G31350
AT1G31430
AT1G31540
AT1G31550
AT1G31580
AT1G31660
AT1G31710
AT1G31750
AT1G31760
AT1G31817
AT1G31820
AT1G31835
AT1G31840
AT1G31900
AT1G31935
AT1G31950
AT1G31970
AT1G32100
AT1G32170
AT1G32190
AT1G32260
AT1G32350
AT1G32370
AT1G32385
AT1G32415
AT1G32440
AT1G32450
AT1G32540
AT1G32640
AT1G32700
AT1G32760
AT1G32860
AT1G32870
AT1G32900
AT1G32928
AT1G32950
AT1G32960
AT1G33030
AT1G33055
AT1G33102
AT1G33120
AT1G33140
AT1G33230
AT1G33240
AT1G33340
AT1G33390
AT1G33475
AT1G33590
AT1G33610
AT1G33612
AT1G33615
AT1G33770
AT1G33780
AT1G33790
AT1G33800
AT1G33811
AT1G33970
AT1G34030
AT1G34060
AT1G34160
AT1G34180
AT1G34315
AT1G34380
AT1G34420
AT1G34460
AT1G34580
AT1G34640
AT1G34750
AT1G35140
AT1G35180
AT1G35210
AT1G35260
AT1G35290
AT1G35310
AT1G35320
AT1G35350
AT1G35420
AT1G35430
AT1G35515
AT1G35516
AT1G35530
AT1G35580
AT1G35612
AT1G35670
AT1G35710
AT1G35720
AT1G35910
AT1G36060
AT1G36280
AT1G36310
AT1G36380
AT1G36622
AT1G36675
AT1G36680
AT1G36940
AT1G37130
AT1G38065
AT1G41880
AT1G42440
AT1G42990
AT1G43160
AT1G43170
AT1G43245
AT1G43580
AT1G43590
AT1G43605
AT1G43670
AT1G43675
AT1G43775
AT1G43800
AT1G43860
AT1G43886
AT1G43890
AT1G43980
AT1G44100
AT1G44120
AT1G44125
AT1G44130
AT1G44350
AT1G44446
AT1G44575
AT1G44770
AT1G44790
AT1G44830
AT1G44890
AT1G45110
AT1G45145
AT1G45163
AT1G45191
AT1G45201
AT1G45231
AT1G45248
AT1G45249
AT1G45332
AT1G45545
AT1G45616
AT1G46552
AT1G46768
AT1G47128
AT1G47370
AT1G47395
AT1G47400
AT1G47440
AT1G47490
AT1G47500
AT1G47510
AT1G47520
AT1G47530
AT1G47710
AT1G47760
AT1G47960
AT1G48000
AT1G48030
AT1G48100
AT1G48120
AT1G48210
AT1G48260
AT1G48267
AT1G48300
AT1G48320
AT1G48330
AT1G48370
AT1G48420
AT1G48430
AT1G48460
AT1G48500
AT1G48540
AT1G48560
AT1G48570
AT1G48580
AT1G48600
AT1G48630
AT1G48650
AT1G48660
AT1G48720
AT1G48745
AT1G48770
AT1G48780
AT1G48850
AT1G48920
AT1G49032
AT1G49050
AT1G49130
AT1G49140
AT1G49170
AT1G49180
AT1G49200
AT1G49240
AT1G49310
AT1G49370
AT1G49405
AT1G49410
AT1G49450
AT1G49480
AT1G49490
AT1G49500
AT1G49530
AT1G49540
AT1G49560
AT1G49600
AT1G49620
AT1G49700
AT1G49720
AT1G49730
AT1G49750
AT1G49760
AT1G49920
AT1G49940
AT1G49975
AT1G50000
AT1G50180
AT1G50280
AT1G50290
AT1G50400
AT1G50420
AT1G50480
AT1G50590
AT1G50732
AT1G50740
AT1G50750
AT1G50830
AT1G50910
AT1G50950
AT1G50970
AT1G51090
AT1G51140
AT1G51270
AT1G51310
AT1G51360
AT1G51380
AT1G51400
AT1G51402
AT1G51430
AT1G51440
AT1G51620
AT1G51645
AT1G51670
AT1G51700
AT1G51760
AT1G51790
AT1G51800
AT1G51805
AT1G51850
AT1G51860
AT1G51890
AT1G52000
AT1G52030
AT1G52040
AT1G52155
AT1G52160
AT1G52190
AT1G52200
AT1G52220
AT1G52230
AT1G52240
AT1G52245
AT1G52280
AT1G52290
AT1G52300
AT1G52315
AT1G52340
AT1G52380
AT1G52400
AT1G52410
AT1G52430
AT1G52450
AT1G52530
AT1G52565
AT1G52618
AT1G52640
AT1G52710
AT1G52720
AT1G52750
AT1G52770
AT1G52800
AT1G52820
AT1G52855
AT1G52880
AT1G52890
AT1G52930
AT1G52940
AT1G53035
AT1G53060
AT1G53090
AT1G53100
AT1G53160
AT1G53170
AT1G53180
AT1G53200
AT1G53230
AT1G53240
AT1G53260
AT1G53280
AT1G53330
AT1G53350
AT1G53390
AT1G53480
AT1G53500
AT1G53510
AT1G53520
AT1G53541
AT1G53542
AT1G53560
AT1G53580
AT1G53600
AT1G53633
AT1G53645
AT1G53680
AT1G53710
AT1G53780
AT1G53785
AT1G53800
AT1G53830
AT1G53875
AT1G53885
AT1G53887
AT1G53903
AT1G54000
AT1G54010
AT1G54020
AT1G54040
AT1G54050
AT1G54100
AT1G54217
AT1G54220
AT1G54270
AT1G54310
AT1G54390
AT1G54570
AT1G54575
AT1G54680
AT1G54690
AT1G54730
AT1G54740
AT1G54770
AT1G54773
AT1G54780
AT1G54820
AT1G55000
AT1G55040
AT1G55205
AT1G55210
AT1G55280
AT1G55310
AT1G55320
AT1G55330
AT1G55360
AT1G55450
AT1G55490
AT1G55500
AT1G55550
AT1G55670
AT1G55675
AT1G55690
AT1G55820
AT1G55850
AT1G55870
AT1G55880
AT1G55900
AT1G55910
AT1G55915
AT1G55920
AT1G55940
AT1G55960
AT1G56010
AT1G56045
AT1G56050
AT1G56070
AT1G56110
AT1G56120
AT1G56130
AT1G56150
AT1G56165
AT1G56170
AT1G56180
AT1G56220
AT1G56250
AT1G56280
AT1G56300
AT1G56430
AT1G56540
AT1G56550
AT1G56600
AT1G56612
AT1G56650
AT1G56660
AT1G56690
AT1G56710
AT1G56720
AT1G57590
AT1G57600
AT1G57610
AT1G57630
AT1G57660
AT1G57790
AT1G57850
AT1G57860
AT1G57980
AT1G57990
AT1G58030
AT1G58070
AT1G58130
AT1G58150
AT1G58170
AT1G58180
AT1G58200
AT1G58225
AT1G58270
AT1G58280
AT1G58290
AT1G58360
AT1G58370
AT1G58380
AT1G58390
AT1G58420
AT1G58460
AT1G58520
AT1G58602
AT1G58807
AT1G59124
AT1G59265
AT1G59580
AT1G59590
AT1G59620
AT1G59710
AT1G59850
AT1G59870
AT1G59930
AT1G59950
AT1G59960
AT1G59990
AT1G60010
AT1G60080
AT1G60160
AT1G60190
AT1G60260
AT1G60270
AT1G60390
AT1G60460
AT1G60470
AT1G60505
AT1G60550
AT1G60630
AT1G60640
AT1G60680
AT1G60730
AT1G60790
AT1G60850
AT1G60890
AT1G60960
AT1G60989
AT1G61065
AT1G61120
AT1G61210
AT1G61240
AT1G61340
AT1G61360
AT1G61370
AT1G61380
AT1G61390
AT1G61420
AT1G61430
AT1G61450
AT1G61460
AT1G61490
AT1G61500
AT1G61520
AT1G61570
AT1G61580
AT1G61610
AT1G61640
AT1G61730
AT1G61795
AT1G61800
AT1G61810
AT1G61820
AT1G61860
AT1G61870
AT1G61890
AT1G61930
AT1G61990
AT1G62110
AT1G62150
AT1G62180
AT1G62200
AT1G62240
AT1G62250
AT1G62260
AT1G62290
AT1G62300
AT1G62350
AT1G62370
AT1G62422
AT1G62440
AT1G62480
AT1G62510
AT1G62520
AT1G62540
AT1G62560
AT1G62570
AT1G62620
AT1G62660
AT1G62710
AT1G62720
AT1G62730
AT1G62740
AT1G62750
AT1G62760
AT1G62770
AT1G62780
AT1G62800
AT1G62835
AT1G62975
AT1G63100
AT1G63160
AT1G63180
AT1G63240
AT1G63250
AT1G63260
AT1G63295
AT1G63300
AT1G63520
AT1G63530
AT1G63660
AT1G63690
AT1G63740
AT1G63750
AT1G63780
AT1G63800
AT1G63810
AT1G63860
AT1G63900
AT1G63930
AT1G64065
AT1G64170
AT1G64185
AT1G64200
AT1G64220
AT1G64270
AT1G64310
AT1G64320
AT1G64360
AT1G64370
AT1G64490
AT1G64500
AT1G64560
AT1G64561
AT1G64563
AT1G64600
AT1G64660
AT1G64710
AT1G64720
AT1G64740
AT1G64760
AT1G64780
AT1G64790
AT1G64880
AT1G64890
AT1G64900
AT1G64970
AT1G65000
AT1G65030
AT1G65040
AT1G65060
AT1G65070
AT1G65080
AT1G65110
AT1G65120
AT1G65230
AT1G65240
AT1G65300
AT1G65310
AT1G65390
AT1G65420
AT1G65486
AT1G65490
AT1G65520
AT1G65560
AT1G65590
AT1G65660
AT1G65700
AT1G65790
AT1G65800
AT1G65845
AT1G65860
AT1G65870
AT1G65890
AT1G65930
AT1G65960
AT1G65985
AT1G66070
AT1G66080
AT1G66090
AT1G66100
AT1G66160
AT1G66190
AT1G66230
AT1G66330
AT1G66350
AT1G66370
AT1G66390
AT1G66465
AT1G66480
AT1G66520
AT1G66580
AT1G66700
AT1G66725
AT1G66820
AT1G66880
AT1G66890
AT1G66900
AT1G66920
AT1G66930
AT1G66940
AT1G66960
AT1G66970
AT1G67000
AT1G67080
AT1G67090
AT1G67110
AT1G67120
AT1G67210
AT1G67265
AT1G67325
AT1G67330
AT1G67360
AT1G67365
AT1G67370
AT1G67430
AT1G67470
AT1G67560
AT1G67570
AT1G67590
AT1G67620
AT1G67650
AT1G67660
AT1G67740
AT1G67750
AT1G67760
AT1G67800
AT1G67810
AT1G67830
AT1G67850
AT1G67856
AT1G67860
AT1G67865
AT1G67870
AT1G67910
AT1G67920
AT1G67970
AT1G68010
AT1G68030
AT1G68050
AT1G68110
AT1G68120
AT1G68190
AT1G68238
AT1G68290
AT1G68440
AT1G68460
AT1G68470
AT1G68480
AT1G68500
AT1G68520
AT1G68530
AT1G68550
AT1G68552
AT1G68560
AT1G68568
AT1G68570
AT1G68585
AT1G68600
AT1G68620
AT1G68650
AT1G68725
AT1G68840
AT1G68862
AT1G68870
AT1G68872
AT1G68930
AT1G68935
AT1G68940
AT1G68945
AT1G68990
AT1G69070
AT1G69160
AT1G69200
AT1G69210
AT1G69250
AT1G69260
AT1G69270
AT1G69295
AT1G69310
AT1G69350
AT1G69370
AT1G69400
AT1G69410
AT1G69430
AT1G69440
AT1G69450
AT1G69480
AT1G69490
AT1G69510
AT1G69526
AT1G69530
AT1G69570
AT1G69572
AT1G69610
AT1G69620
AT1G69720
AT1G69730
AT1G69760
AT1G69830
AT1G69870
AT1G69900
AT1G69930
AT1G70020
AT1G70160
AT1G70185
AT1G70200
AT1G70270
AT1G70290
AT1G70300
AT1G70420
AT1G70430
AT1G70520
AT1G70530
AT1G70600
AT1G70610
AT1G70620
AT1G70630
AT1G70640
AT1G70690
AT1G70700
AT1G70720
AT1G70760
AT1G70780
AT1G70782
AT1G70800
AT1G70810
AT1G70820
AT1G70830
AT1G70890
AT1G70900
AT1G70985
AT1G70990
AT1G71000
AT1G71002
AT1G71015
AT1G71030
AT1G71040
AT1G71060
AT1G71130
AT1G71140
AT1G71180
AT1G71210
AT1G71240
AT1G71260
AT1G71340
AT1G71360
AT1G71420
AT1G71430
AT1G71460
AT1G71528
AT1G71695
AT1G71750
AT1G71800
AT1G71850
AT1G71880
AT1G71910
AT1G71930
AT1G71950
AT1G71970
AT1G71990
AT1G72000
AT1G72030
AT1G72040
AT1G72060
AT1G72120
AT1G72140
AT1G72150
AT1G72160
AT1G72275
AT1G72280
AT1G72320
AT1G72360
AT1G72370
AT1G72410
AT1G72416
AT1G72430
AT1G72440
AT1G72510
AT1G72530
AT1G72610
AT1G72630
AT1G72645
AT1G72730
AT1G72770
AT1G72790
AT1G72800
AT1G72820
AT1G72855
AT1G72870
AT1G72890
AT1G72900
AT1G72910
AT1G72920
AT1G72930
AT1G72940
AT1G73010
AT1G73040
AT1G73066
AT1G73140
AT1G73230
AT1G73325
AT1G73330
AT1G73390
AT1G73470
AT1G73480
AT1G73540
AT1G73550
AT1G73590
AT1G73600
AT1G73630
AT1G73650
AT1G73655
AT1G73670
AT1G73687
AT1G73700
AT1G73750
AT1G73810
AT1G73860
AT1G73870
AT1G73890
AT1G73920
AT1G73970
AT1G74070
AT1G74088
AT1G74150
AT1G74170
AT1G74210
AT1G74280
AT1G74300
AT1G74310
AT1G74360
AT1G74370
AT1G74385
AT1G74400
AT1G74410
AT1G74430
AT1G74440
AT1G74450
AT1G74458
AT1G74470
AT1G74540
AT1G74560
AT1G74650
AT1G74670
AT1G74700
AT1G74710
AT1G74750
AT1G74800
AT1G74870
AT1G74880
AT1G74930
AT1G74940
AT1G75030
AT1G75040
AT1G75130
AT1G75170
AT1G75180
AT1G75200
AT1G75220
AT1G75250
AT1G75295
AT1G75300
AT1G75370
AT1G75380
AT1G75388
AT1G75390
AT1G75460
AT1G75490
AT1G75590
AT1G75670
AT1G75750
AT1G75800
AT1G75860
AT1G75900
AT1G75960
AT1G76080
AT1G76090
AT1G76100
AT1G76120
AT1G76150
AT1G76160
AT1G76240
AT1G76270
AT1G76300
AT1G76460
AT1G76520
AT1G76560
AT1G76570
AT1G76580
AT1G76590
AT1G76680
AT1G76705
AT1G76720
AT1G76790
AT1G76800
AT1G76870
AT1G76890
AT1G76892
AT1G76960
AT1G76980
AT1G77010
AT1G77030
AT1G77120
AT1G77131
AT1G77145
AT1G77200
AT1G77210
AT1G77280
AT1G77320
AT1G77330
AT1G77370
AT1G77380
AT1G77390
AT1G77405
AT1G77420
AT1G77450
AT1G77480
AT1G77490
AT1G77520
AT1G77550
AT1G77570
AT1G77580
AT1G77600
AT1G77610
AT1G77700
AT1G77750
AT1G77760
AT1G77765
AT1G77810
AT1G77850
AT1G77870
AT1G77885
AT1G77930
AT1G77940
AT1G77960
AT1G77990
AT1G78000
AT1G78020
AT1G78030
AT1G78050
AT1G78070
AT1G78080
AT1G78100
AT1G78130
AT1G78190
AT1G78206
AT1G78260
AT1G78265
AT1G78270
AT1G78290
AT1G78320
AT1G78370
AT1G78410
AT1G78440
AT1G78460
AT1G78476
AT1G78480
AT1G78490
AT1G78510
AT1G78550
AT1G78560
AT1G78570
AT1G78600
AT1G78610
AT1G78660
AT1G78670
AT1G78680
AT1G78750
AT1G78780
AT1G78830
AT1G78850
AT1G78860
AT1G78865
AT1G78890
AT1G78930
AT1G78950
AT1G78955
AT1G78970
AT1G78990
AT1G79040
AT1G79075
AT1G79080
AT1G79150
AT1G79170
AT1G79190
AT1G79270
AT1G79310
AT1G79330
AT1G79380
AT1G79390
AT1G79400
AT1G79410
AT1G79440
AT1G79450
AT1G79460
AT1G79470
AT1G79490
AT1G79510
AT1G79529
AT1G79530
AT1G79550
AT1G79560
AT1G79620
AT1G79670
AT1G79680
AT1G79700
AT1G79720
AT1G79740
AT1G79760
AT1G79770
AT1G79780
AT1G79790
AT1G79900
AT1G79910
AT1G79920
AT1G79930
AT1G80120
AT1G80130
AT1G80150
AT1G80160
AT1G80180
AT1G80190
AT1G80245
AT1G80270
AT1G80280
AT1G80310
AT1G80320
AT1G80340
AT1G80390
AT1G80420
AT1G80440
AT1G80450
AT1G80460
AT1G80480
AT1G80570
AT1G80610
AT1G80630
AT1G80650
AT1G80690
AT1G80710
AT1G80720
AT1G80730
AT1G80750
AT1G80760
AT1G80770
AT1G80780
AT1G80790
AT1G80820
AT1G80850
AT1G80920
AT1G80960
AT1G80970
AT2G01008
AT2G01120
AT2G01170
AT2G01180
AT2G01200
AT2G01250
AT2G01280
AT2G01290
AT2G01300
AT2G01340
AT2G01420
AT2G01422
AT2G01510
AT2G01520
AT2G01540
AT2G01590
AT2G01610
AT2G01620
AT2G01640
AT2G01660
AT2G01730
AT2G01740
AT2G01750
AT2G01755
AT2G01818
AT2G01860
AT2G01870
AT2G01905
AT2G01918
AT2G02020
AT2G02100
AT2G02120
AT2G02150
AT2G02350
AT2G02360
AT2G02410
AT2G02710
AT2G02740
AT2G02765
AT2G02770
AT2G02780
AT2G02810
AT2G02930
AT2G02950
AT2G02955
AT2G02990
AT2G03010
AT2G03110
AT2G03260
[truncated: 5,304 more rows]

## Sheet: DAS
Supplemental Table 5: Genes alternatively spliced during cold exposure (DAS), based on published data (Calixto et al., 2018)
2442
AT1G01020
AT1G01060
AT1G01220
AT1G01260
AT1G01290
AT1G01448
AT1G01550
AT1G01700
AT1G01770
AT1G01860
AT1G01910
AT1G01920
AT1G02080
AT1G02090
AT1G02100
AT1G02145
AT1G02205
AT1G02260
AT1G02300
AT1G02350
AT1G02500
AT1G02680
AT1G02840
AT1G02880
AT1G02930
AT1G03030
AT1G03055
AT1G03080
AT1G03090
AT1G03210
AT1G03310
AT1G03370
AT1G03380
AT1G03410
AT1G03520
AT1G03550
AT1G03610
AT1G03687
AT1G03905
AT1G03960
AT1G04010
AT1G04080
AT1G04140
AT1G04300
AT1G04350
AT1G04550
AT1G04830
AT1G04910
AT1G04950
AT1G04970
AT1G04985
AT1G05160
AT1G05320
AT1G05360
AT1G05380
AT1G05430
AT1G05540
AT1G05600
AT1G05630
AT1G05710
AT1G05750
AT1G05790
AT1G05820
AT1G05830
AT1G05860
AT1G05870
AT1G05900
AT1G05940
AT1G06040
AT1G06220
AT1G06230
AT1G06390
AT1G06500
AT1G06560
AT1G06645
AT1G06710
AT1G06770
AT1G06890
AT1G06910
AT1G06960
AT1G07010
AT1G07020
AT1G07110
AT1G07350
AT1G07480
AT1G07570
AT1G07640
AT1G07700
AT1G07728
AT1G07780
AT1G07820
AT1G07910
AT1G07950
AT1G08040
AT1G08060
AT1G08110
AT1G08550
AT1G08620
AT1G08660
AT1G08680
AT1G08710
AT1G08720
AT1G08750
AT1G08900
AT1G08910
AT1G09140
AT1G09160
AT1G09195
AT1G09230
AT1G09530
AT1G09710
AT1G09995
AT1G10050
AT1G10240
AT1G10320
AT1G10360
AT1G10390
AT1G10522
AT1G10570
AT1G10600
AT1G10660
AT1G10820
AT1G10890
AT1G10900
AT1G10910
AT1G10920
AT1G11060
AT1G11330
AT1G11360
AT1G11400
AT1G11592
AT1G11785
AT1G12244
AT1G12350
AT1G12400
AT1G12650
AT1G12730
AT1G12750
AT1G12880
AT1G13195
AT1G13350
AT1G13390
AT1G13410
AT1G13450
AT1G13460
AT1G13570
AT1G13800
AT1G13860
AT1G13880
AT1G13980
AT1G13990
AT1G14030
AT1G14140
AT1G14170
AT1G14270
AT1G14350
AT1G14570
AT1G14685
AT1G14690
AT1G14820
AT1G15060
AT1G15110
AT1G15170
AT1G15200
AT1G15215
AT1G15280
AT1G15400
AT1G15790
AT1G15960
AT1G16010
AT1G16020
AT1G16180
AT1G16260
AT1G16270
AT1G16460
AT1G16540
AT1G16570
AT1G16610
AT1G16650
AT1G16820
AT1G16840
AT1G17110
AT1G17130
AT1G17145
AT1G17230
AT1G17270
AT1G17330
AT1G17440
AT1G17520
AT1G17550
AT1G17680
AT1G17720
AT1G17850
AT1G17990
AT1G18030
AT1G18090
AT1G18160
AT1G18190
AT1G18340
AT1G18440
AT1G18460
AT1G18610
AT1G18650
AT1G18660
AT1G18700
AT1G18750
AT1G18773
AT1G18800
AT1G18950
AT1G19000
AT1G19010
AT1G19080
AT1G19130
AT1G19330
AT1G19340
AT1G19394
AT1G19400
AT1G19660
AT1G19690
AT1G19700
AT1G19720
AT1G19860
AT1G19870
AT1G20100
AT1G20410
AT1G20560
AT1G20810
AT1G20880
AT1G20890
AT1G20920
AT1G21060
AT1G21400
AT1G21450
AT1G21480
AT1G21560
AT1G21580
AT1G21610
AT1G21780
AT1G21840
AT1G22020
AT1G22140
AT1G22180
AT1G22310
AT1G22330
AT1G22370
AT1G22400
AT1G22403
AT1G22430
AT1G22490
AT1G22750
AT1G22860
AT1G22870
AT1G22910
AT1G22960
AT1G23080
AT1G23230
AT1G23360
AT1G24148
AT1G24265
AT1G24300
AT1G24340
AT1G24350
AT1G24440
AT1G24706
AT1G24764
AT1G24793
AT1G24825
AT1G25098
AT1G25175
AT1G25230
AT1G25290
AT1G25375
AT1G25420
AT1G25540
AT1G25682
AT1G26100
AT1G26130
AT1G26170
AT1G26208
AT1G26230
AT1G26440
AT1G26580
AT1G26640
AT1G27420
AT1G27450
AT1G27520
AT1G27540
AT1G27630
AT1G27752
AT1G27840
AT1G27920
AT1G27960
AT1G28060
AT1G28100
AT1G28210
AT1G28320
AT1G28330
AT1G28395
AT1G28520
AT1G28530
AT1G28580
AT1G28610
AT1G28710
AT1G28960
AT1G29120
AT1G29310
AT1G29357
AT1G29400
AT1G29410
AT1G29465
AT1G29800
AT1G29850
AT1G29900
AT1G30130
AT1G30160
AT1G30200
AT1G30410
AT1G30450
AT1G30590
AT1G30835
AT1G30910
AT1G30970
AT1G31020
AT1G31175
AT1G31410
AT1G31420
AT1G31500
AT1G31540
AT1G31550
AT1G31600
AT1G31830
AT1G31870
AT1G32070
AT1G32127
AT1G32200
AT1G32230
AT1G32330
AT1G32540
AT1G32700
AT1G33050
AT1G33110
AT1G33240
AT1G33360
AT1G33400
AT1G33410
AT1G33680
AT1G33970
AT1G34020
AT1G34110
AT1G34270
AT1G34315
AT1G34320
AT1G34340
AT1G34370
AT1G34380
AT1G34418
AT1G34570
AT1G34630
AT1G34640
AT1G34750
AT1G34844
AT1G35340
AT1G35510
AT1G35516
AT1G35612
AT1G36070
AT1G42540
AT1G43580
AT1G43620
AT1G43770
AT1G43850
AT1G44446
AT1G44750
AT1G44780
AT1G44910
AT1G45010
AT1G45207
AT1G45249
AT1G47270
AT1G47290
AT1G47490
AT1G47520
AT1G47530
AT1G47550
AT1G47720
AT1G47820
AT1G48030
AT1G48175
AT1G48260
AT1G48270
AT1G48310
AT1G48390
AT1G48410
AT1G48430
AT1G48490
AT1G48520
AT1G48540
AT1G49180
AT1G49350
AT1G49590
AT1G49630
AT1G49730
AT1G49975
AT1G50140
AT1G50200
AT1G50260
AT1G50440
AT1G50460
AT1G50700
AT1G50950
AT1G50970
AT1G51070
AT1G51160
AT1G51270
AT1G51430
AT1G51690
AT1G51720
AT1G51965
AT1G52260
AT1G52565
AT1G52630
AT1G52710
AT1G52730
AT1G53040
AT1G53090
AT1G53380
AT1G53400
AT1G53440
AT1G53450
AT1G53510
AT1G53590
AT1G53770
AT1G53780
AT1G53800
AT1G54110
AT1G54170
AT1G54310
AT1G54350
AT1G54360
AT1G54370
AT1G54380
AT1G54390
AT1G54440
AT1G54610
AT1G54730
AT1G54920
AT1G55000
AT1G55110
AT1G55250
AT1G55280
AT1G55310
AT1G55320
AT1G55340
AT1G55475
AT1G55520
AT1G55680
AT1G55690
AT1G55750
AT1G55810
AT1G55830
AT1G56010
AT1G56230
AT1G56280
AT1G56300
AT1G56350
AT1G56520
AT1G56660
AT1G56700
AT1G56720
AT1G57600
AT1G57770
AT1G58180
AT1G58200
AT1G58602
AT1G58807
AT1G59124
AT1G59218
AT1G59560
AT1G59600
AT1G59620
AT1G59710
AT1G59750
AT1G59840
AT1G59890
AT1G60200
AT1G60260
AT1G60270
AT1G60505
AT1G60525
AT1G60545
AT1G60560
AT1G60610
AT1G60670
AT1G60690
AT1G60900
AT1G60990
AT1G61010
AT1G61150
AT1G61180
AT1G61210
AT1G61340
AT1G61430
AT1G61500
AT1G61980
AT1G62200
AT1G62250
AT1G62540
AT1G62560
AT1G62590
AT1G62600
AT1G62610
AT1G62630
AT1G62710
AT1G63100
AT1G63110
AT1G63130
AT1G63250
AT1G63260
AT1G63420
AT1G63490
AT1G63640
AT1G63800
AT1G63855
AT1G63940
AT1G64270
AT1G64385
AT1G64430
AT1G64770
AT1G64810
AT1G64990
AT1G65000
AT1G65040
AT1G65070
AT1G65120
AT1G65270
AT1G65280
AT1G66260
AT1G66460
AT1G66520
AT1G66540
AT1G66750
AT1G66980
AT1G67040
AT1G67300
AT1G67400
AT1G67700
AT1G67710
AT1G67850
AT1G67900
AT1G67950
AT1G67960
AT1G68080
AT1G68550
AT1G68580
AT1G68710
AT1G69080
AT1G69170
AT1G69310
AT1G69360
AT1G69370
AT1G69450
AT1G69572
AT1G69610
AT1G69830
AT1G69840
AT1G69980
AT1G70100
AT1G70180
AT1G70190
AT1G70210
AT1G70505
AT1G70518
AT1G70580
AT1G70590
AT1G70610
AT1G70620
AT1G70820
AT1G70980
AT1G71240
AT1G71340
AT1G71410
AT1G71696
AT1G71810
AT1G72030
AT1G72050
AT1G72130
AT1G72190
AT1G72320
AT1G72500
AT1G72560
AT1G72640
AT1G72650
AT1G72740
AT1G72770
AT1G72855
AT1G73110
AT1G73170
AT1G73320
AT1G73350
AT1G73390
AT1G73440
AT1G73470
AT1G73480
AT1G73490
AT1G73650
AT1G73680
AT1G73750
AT1G73760
AT1G73920
AT1G73960
AT1G73990
AT1G74170
AT1G74180
AT1G74300
AT1G74310
AT1G74530
AT1G74590
AT1G74700
AT1G74910
AT1G75020
AT1G75080
AT1G75210
AT1G75230
AT1G75380
AT1G75410
AT1G75420
AT1G75730
AT1G75760
AT1G75850
AT1G75860
AT1G75980
AT1G76050
AT1G76280
AT1G76340
AT1G76350
AT1G76520
AT1G76570
AT1G76580
AT1G76630
AT1G76970
AT1G77080
AT1G77260
AT1G77290
AT1G77310
AT1G77320
AT1G77440
AT1G77470
AT1G77480
AT1G77770
AT1G77800
AT1G77810
AT1G78000
AT1G78010
AT1G78070
AT1G78490
AT1G78510
AT1G78660
AT1G78680
AT1G78790
AT1G78800
AT1G78810
AT1G78910
AT1G78920
AT1G78970
AT1G78995
AT1G79000
AT1G79020
AT1G79090
AT1G79110
AT1G79190
AT1G79245
AT1G79270
AT1G79380
AT1G79500
AT1G79520
AT1G79529
AT1G79570
AT1G79640
AT1G79710
AT1G79740
AT1G79790
AT1G79820
AT1G79880
AT1G80000
AT1G80030
AT1G80050
AT1G80150
AT1G80170
AT1G80190
AT1G80210
AT1G80260
AT1G80270
AT1G80325
AT1G80490
AT1G80770
AT1G80780
AT1G80790
AT1G80860
AT1G80940
AT1G80980
AT2G01100
AT2G01220
AT2G01260
AT2G01270
AT2G01320
AT2G01420
AT2G01450
AT2G01470
AT2G01480
AT2G01680
AT2G01690
AT2G01735
AT2G02080
AT2G02148
AT2G02410
AT2G02450
AT2G02470
AT2G02710
AT2G02765
AT2G02910
AT2G02960
AT2G03140
AT2G03150
AT2G03530
AT2G03640
AT2G03710
AT2G04039
AT2G04110
AT2G04378
AT2G04430
AT2G04540
AT2G04690
AT2G04865
AT2G04880
AT2G05185
AT2G05210
AT2G05220
AT2G05518
AT2G05590
AT2G05632
AT2G05830
AT2G06000
AT2G06025
AT2G07042
AT2G07180
AT2G11000
AT2G12400
AT2G13440
AT2G13800
AT2G13975
AT2G14110
AT2G14260
AT2G14520
AT2G14530
AT2G14680
AT2G15530
AT2G15580
AT2G15730
AT2G16090
AT2G16370
AT2G16640
AT2G16750
AT2G16940
AT2G16990
AT2G17020
AT2G17033
AT2G17220
AT2G17320
AT2G17530
AT2G17560
AT2G17640
AT2G17710
AT2G17730
AT2G17780
AT2G17787
AT2G17970
AT2G17990
AT2G18230
AT2G18245
AT2G18280
AT2G18630
AT2G18750
AT2G18760
AT2G18790
AT2G19250
AT2G19260
AT2G19340
AT2G20050
AT2G20290
AT2G20585
AT2G20740
AT2G20770
AT2G20830
AT2G20860
AT2G20900
AT2G20950
AT2G21150
AT2G21370
AT2G21410
AT2G21470
AT2G21500
AT2G21540
AT2G21660
AT2G21710
AT2G21830
AT2G21940
AT2G22300
AT2G22310
AT2G22710
AT2G22830
AT2G22970
AT2G22980
AT2G22990
AT2G23310
AT2G23330
AT2G23420
AT2G23470
AT2G23980
AT2G24120
AT2G24150
AT2G24270
AT2G24280
AT2G24360
AT2G24530
AT2G24590
AT2G24650
AT2G24690
AT2G25290
AT2G25300
AT2G25350
AT2G25590
AT2G25670
AT2G25730
AT2G25930
AT2G25950
AT2G26200
AT2G26210
AT2G26260
AT2G26350
AT2G26430
AT2G26540
AT2G26590
AT2G26770
AT2G26800
AT2G26810
AT2G26980
AT2G27110
AT2G27150
AT2G27340
AT2G27350
AT2G27400
AT2G27460
AT2G27480
AT2G27900
AT2G27950
AT2G28060
AT2G28290
AT2G28320
AT2G28470
AT2G28540
AT2G28570
AT2G28880
AT2G28940
AT2G29140
AT2G29190
AT2G29310
AT2G29390
AT2G29540
AT2G29630
AT2G29650
AT2G29670
AT2G29910
AT2G30070
AT2G30170
AT2G30600
AT2G30695
AT2G30700
AT2G30990
AT2G31190
AT2G31290
AT2G31560
AT2G31580
AT2G31740
AT2G31751
AT2G31800
AT2G31830
AT2G31900
AT2G32000
AT2G32010
AT2G32040
AT2G32160
AT2G32295
AT2G32415
AT2G32530
AT2G32640
AT2G32700
AT2G32710
AT2G32760
AT2G32850
AT2G32870
AT2G32970
AT2G33110
AT2G33480
AT2G33620
AT2G33740
AT2G33760
AT2G33820
AT2G34090
AT2G34200
AT2G34310
AT2G34720
AT2G34780
AT2G34850
AT2G35020
AT2G35130
AT2G35360
AT2G35390
AT2G35510
AT2G35620
AT2G35630
AT2G35660
AT2G35760
AT2G35830
AT2G35920
AT2G36000
AT2G36060
AT2G36320
AT2G36370
AT2G36390
AT2G36670
AT2G36680
AT2G36720
AT2G36792
AT2G36960
AT2G36980
AT2G37080
AT2G37300
AT2G37340
AT2G37450
AT2G37540
AT2G37640
AT2G37678
AT2G38040
AT2G38185
AT2G38260
AT2G38330
AT2G38460
AT2G38550
AT2G38570
AT2G38630
AT2G38660
AT2G38780
AT2G38880
AT2G38980
AT2G38995
AT2G39000
AT2G39090
AT2G39130
AT2G39170
AT2G39190
AT2G39240
AT2G39280
AT2G39340
AT2G39440
AT2G39470
AT2G39550
AT2G39580
AT2G39681
AT2G39690
AT2G39760
AT2G39800
AT2G39950
AT2G40020
AT2G40110
AT2G40410
AT2G40460
AT2G40540
AT2G40630
AT2G40640
AT2G40690
AT2G41020
AT2G41050
AT2G41060
AT2G41100
AT2G41700
AT2G41705
AT2G41710
AT2G41720
AT2G41880
AT2G42160
AT2G42170
AT2G42190
AT2G42240
AT2G42247
AT2G42600
AT2G42670
AT2G42950
AT2G43010
AT2G43080
AT2G43190
AT2G43235
AT2G43330
AT2G43410
AT2G43500
AT2G43760
AT2G43850
AT2G43920
AT2G44090
AT2G44140
AT2G44150
AT2G44280
AT2G44420
AT2G44680
AT2G44710
AT2G44800
AT2G44900
AT2G44920
AT2G44950
AT2G45010
AT2G45150
AT2G45250
AT2G45280
AT2G45380
AT2G45480
AT2G45510
AT2G45870
AT2G45950
AT2G45990
AT2G46200
AT2G46270
AT2G46280
AT2G46320
AT2G46420
AT2G46500
AT2G46535
AT2G46710
AT2G46730
AT2G46790
AT2G46800
AT2G46810
AT2G46830
AT2G46915
AT2G46970
AT2G47060
AT2G47210
AT2G47230
AT2G47250
AT2G47370
AT2G47410
AT2G47630
AT2G47640
AT2G47760
AT2G47820
AT2G47850
AT2G47890
AT2G47960
AT2G48100
AT3G01100
AT3G01150
AT3G01310
AT3G01360
AT3G01380
AT3G01480
AT3G01510
AT3G01540
AT3G01560
AT3G01590
AT3G01650
AT3G01710
AT3G01770
AT3G01850
AT3G01980
AT3G02150
AT3G02290
AT3G02300
AT3G02380
AT3G02470
AT3G02600
AT3G02690
AT3G02750
AT3G02770
AT3G02875
AT3G02920
AT3G02990
AT3G03020
AT3G03040
AT3G03340
AT3G03560
AT3G03770
AT3G03810
AT3G04130
AT3G04160
AT3G04350
AT3G04485
AT3G04500
AT3G04605
AT3G04610
AT3G04680
AT3G04970
AT3G05030
AT3G05050
AT3G05090
AT3G05160
AT3G05210
AT3G05250
AT3G05270
AT3G05345
AT3G05420
AT3G05700
AT3G05740
AT3G05940
AT3G06250
AT3G06290
AT3G06330
AT3G06380
AT3G06500
AT3G06620
AT3G06660
AT3G06690
AT3G06760
AT3G06770
AT3G06920
AT3G07020
AT3G07200
AT3G07215
AT3G07280
AT3G07300
AT3G07420
AT3G07440
AT3G07510
AT3G07525
AT3G07530
AT3G07580
AT3G07770
AT3G07930
AT3G07980
AT3G08780
AT3G08840
AT3G08850
AT3G08960
AT3G09160
AT3G09405
AT3G09410
AT3G09470
AT3G09600
AT3G09690
AT3G09800
AT3G10030
AT3G10150
AT3G10160
AT3G10250
AT3G10260
AT3G10390
AT3G10440
AT3G10450
AT3G10550
AT3G10690
AT3G10760
AT3G10820
AT3G10915
AT3G11220
AT3G11280
AT3G11290
AT3G11470
AT3G11620
AT3G11820
AT3G11880
AT3G11890
AT3G11960
AT3G12140
AT3G12150
AT3G12250
AT3G12340
AT3G12350
AT3G12550
AT3G12560
AT3G12620
AT3G12640
AT3G12680
AT3G12820
AT3G12940
AT3G12990
AT3G13000
AT3G13030
AT3G13060
AT3G13062
AT3G13190
AT3G13222
AT3G13225
AT3G13300
AT3G13340
AT3G13430
AT3G13440
AT3G13445
AT3G13560
AT3G13570
AT3G14010
AT3G14075
AT3G14150
AT3G14205
AT3G14550
AT3G14660
AT3G14930
AT3G14960
AT3G15010
AT3G15070
AT3G15220
AT3G15354
AT3G15395
AT3G15880
AT3G16220
AT3G16260
AT3G16270
AT3G16700
AT3G16710
AT3G16800
AT3G16840
AT3G16857
AT3G16940
AT3G17100
AT3G17300
AT3G17310
AT3G17340
AT3G17360
AT3G17450
AT3G17609
AT3G17650
AT3G17740
AT3G17830
AT3G17900
AT3G17910
AT3G17950
AT3G18090
AT3G18100
AT3G18240
AT3G18270
AT3G18380
AT3G18500
AT3G18850
AT3G18970
AT3G19000
AT3G19460
AT3G19510
AT3G19650
AT3G19670
AT3G19720
AT3G19780
AT3G19820
AT3G19860
AT3G20070
AT3G20120
AT3G20270
AT3G20280
AT3G20330
AT3G20490
AT3G20810
AT3G20910
AT3G21110
AT3G21175
AT3G21230
AT3G21250
AT3G21300
AT3G21390
AT3G21430
AT3G21650
AT3G21755
AT3G21810
AT3G22150
AT3G22220
AT3G22235
AT3G22260
AT3G22270
AT3G22380
AT3G22420
AT3G23200
AT3G23210
AT3G23280
AT3G23640
AT3G23820
AT3G23900
AT3G23980
AT3G24120
AT3G24150
AT3G24320
AT3G24440
AT3G24530
AT3G24740
AT3G24760
AT3G24840
AT3G25150
AT3G25480
AT3G25800
AT3G25840
AT3G26085
AT3G26100
AT3G26310
AT3G26360
AT3G26510
AT3G26612
AT3G26670
AT3G26690
AT3G26890
AT3G26900
AT3G26920
AT3G26932
AT3G26950
AT3G26990
AT3G27000
AT3G27010
AT3G27100
AT3G27110
AT3G27260
AT3G27310
AT3G27320
AT3G27325
AT3G27610
AT3G27900
AT3G27940
AT3G27990
AT3G27997
AT3G28070
AT3G28080
AT3G28100
AT3G28130
AT3G28370
AT3G28670
AT3G28956
AT3G28970
AT3G29100
AT3G29130
AT3G29160
AT3G29185
AT3G29240
AT3G29290
AT3G29375
AT3G29390
AT3G30380
AT3G43220
AT3G44150
AT3G44205
AT3G44400
AT3G44630
AT3G44670
AT3G44680
AT3G44740
AT3G45050
AT3G45443
AT3G45750
AT3G45860
AT3G46130
AT3G46200
AT3G46210
AT3G46385
AT3G46490
AT3G46590
AT3G46640
AT3G46780
AT3G46830
AT3G46920
AT3G46950
AT3G46960
AT3G46980
AT3G47000
AT3G47350
AT3G47390
AT3G47500
AT3G47560
AT3G47630
AT3G47910
AT3G47940
AT3G47990
AT3G48050
AT3G48440
AT3G48980
AT3G49140
AT3G49260
AT3G49290
AT3G49410
AT3G49430
AT3G49500
AT3G49590
AT3G49645
AT3G50240
AT3G50430
AT3G50620
AT3G50670
AT3G50780
AT3G50790
AT3G50880
AT3G51100
AT3G51150
AT3G51250
AT3G51270
AT3G51620
AT3G51850
AT3G51950
AT3G52030
AT3G52050
AT3G52072
AT3G52100
AT3G52110
AT3G52120
AT3G52180
AT3G52340
AT3G52560
AT3G52570
AT3G52660
AT3G52720
AT3G52750
AT3G52840
AT3G52920
AT3G53170
AT3G53270
AT3G53350
AT3G53500
AT3G53540
AT3G53570
AT3G53800
AT3G53830
AT3G54170
AT3G54350
AT3G54380
AT3G54390
AT3G54480
AT3G54500
AT3G54740
AT3G54760
AT3G54860
AT3G54880
AT3G54910
AT3G54970
AT3G55020
AT3G55080
AT3G55260
AT3G55290
AT3G55390
AT3G55400
AT3G55480
AT3G55630
AT3G55740
AT3G55850
AT3G55920
AT3G56080
AT3G56110
AT3G56130
AT3G56160
AT3G56510
AT3G56590
AT3G56690
AT3G56720
AT3G56750
AT3G56830
AT3G56840
AT3G56860
AT3G57040
AT3G57062
AT3G57300
AT3G57340
AT3G57410
AT3G57470
AT3G57680
AT3G57710
AT3G57770
AT3G57780
AT3G57880
AT3G57980
AT3G58030
AT3G58050
AT3G58170
AT3G58530
AT3G58670
AT3G58840
AT3G58900
AT3G58940
AT3G59090
AT3G59210
AT3G59300
AT3G59310
AT3G59320
AT3G59350
AT3G59360
AT3G59410
AT3G59470
AT3G59570
AT3G59780
AT3G59800
AT3G59870
AT3G59950
AT3G60240
AT3G60250
AT3G60290
AT3G60500
AT3G60510
AT3G60880
AT3G60910
AT3G61010
AT3G61080
AT3G61160
AT3G61370
AT3G61420
AT3G61480
AT3G61600
AT3G61690
AT3G61710
AT3G61860
AT3G62000
AT3G62110
AT3G62190
AT3G62310
AT3G62330
AT3G62370
AT3G62390
AT3G62620
AT3G62750
AT3G62840
AT3G62860
AT3G63180
AT3G63330
AT3G63340
AT3G63370
AT3G63400
AT3G63440
AT3G63445
AT3G63460
AT3G63510
AT3G63530
AT4G00040
AT4G00050
AT4G00180
AT4G00230
AT4G00335
AT4G00440
AT4G00520
AT4G00560
AT4G00590
AT4G00840
AT4G00930
AT4G00955
AT4G01026
AT4G01510
AT4G01590
AT4G01593
AT4G01600
AT4G01710
AT4G01880
AT4G01883
AT4G01915
AT4G01935
AT4G01995
AT4G02020
AT4G02120
AT4G02210
AT4G02260
AT4G02430
AT4G02540
AT4G02550
AT4G02600
AT4G02740
AT4G02880
AT4G03000
AT4G03140
AT4G03200
AT4G03230
AT4G03240
AT4G03430
AT4G03935
AT4G04200
AT4G04350
AT4G04614
AT4G04740
AT4G04750
AT4G04880
AT4G04920
AT4G05400
AT4G07410
AT4G07507
AT4G07990
AT4G08035
AT4G08170
AT4G08460
AT4G08480
AT4G08540
AT4G08580
AT4G09020
AT4G09140
AT4G09620
AT4G09720
AT4G09760
AT4G09920
AT4G10000
AT4G10070
AT4G10120
AT4G10170
AT4G10360
AT4G10470
AT4G10710
AT4G10730
AT4G10770
AT4G11450
AT4G11670
AT4G11680
AT4G11830
AT4G11840
AT4G11900
AT4G11920
AT4G11960
AT4G12020
AT4G12030
AT4G12460
AT4G12560
AT4G12640
AT4G12720
AT4G12750
AT4G12760
AT4G12790
AT4G12840
AT4G12990
AT4G13150
AT4G13160
AT4G13350
AT4G13495
AT4G13550
AT4G13640
AT4G13800
AT4G13810
AT4G14096
AT4G14145
AT4G14240
AT4G14300
AT4G14340
AT4G14410
AT4G14550
AT4G14720
AT4G14760
AT4G14880
AT4G14905
AT4G14920
AT4G15010
AT4G15080
AT4G15090
AT4G15430
AT4G15510
AT4G15530
AT4G15540
AT4G15570
AT4G16280
AT4G16360
AT4G16420
AT4G16660
AT4G16710
AT4G16765
AT4G16770
AT4G16845
AT4G16857
AT4G16860
AT4G16900
AT4G16960
AT4G16990
AT4G17310
AT4G17330
AT4G17370
AT4G17440
AT4G17570
AT4G17680
AT4G17790
AT4G18020
AT4G18130
AT4G18270
AT4G18375
AT4G18530
AT4G18580
AT4G18740
AT4G18975
AT4G19070
AT4G19110
AT4G19160
AT4G19490
AT4G19500
AT4G19540
AT4G19550
AT4G19670
AT4G19870
AT4G19985
AT4G19990
AT4G20070
AT4G20340
AT4G20380
AT4G20440
AT4G20480
AT4G21090
AT4G21160
AT4G21540
AT4G21660
AT4G21720
AT4G21770
AT4G21860
AT4G21910
AT4G22270
AT4G22350
AT4G22760
AT4G22840
AT4G22970
AT4G22990
AT4G23050
AT4G23250
AT4G23290
AT4G23300
AT4G23330
AT4G23440
AT4G23660
AT4G23710
AT4G23770
AT4G23860
AT4G23910
AT4G23950
AT4G23990
AT4G24060
AT4G24100
AT4G24350
AT4G24440
AT4G24460
AT4G24480
AT4G24490
AT4G24520
AT4G24610
AT4G24630
AT4G24680
AT4G24710
AT4G24730
AT4G24740
AT4G25080
AT4G25230
AT4G25315
AT4G25440
AT4G25450
AT4G25500
AT4G25520
AT4G25640
AT4G25707
AT4G25710
AT4G25770
AT4G25870
AT4G26070
AT4G26140
AT4G26255
AT4G26400
AT4G26520
AT4G26530
AT4G26555
AT4G26630
AT4G26640
AT4G26650
AT4G26795
AT4G26860
AT4G26910
AT4G26965
AT4G27040
AT4G27120
AT4G27270
AT4G27490
AT4G27595
AT4G27610
AT4G27650
AT4G27745
AT4G27780
AT4G27820
AT4G27860
AT4G27900
AT4G27960
AT4G28300
AT4G28760
AT4G28820
AT4G28880
AT4G28900
AT4G28910
AT4G29890
AT4G30060
AT4G30160
AT4G30200
AT4G30310
AT4G30690
AT4G30720
AT4G30760
AT4G30820
AT4G30910
AT4G30993
AT4G31010
AT4G31050
AT4G31115
AT4G31150
AT4G31170
AT4G31180
AT4G31240
AT4G31550
AT4G31720
AT4G31860
AT4G31870
AT4G31890
AT4G32010
AT4G32060
AT4G32140
AT4G32180
AT4G32250
AT4G32330
AT4G32360
AT4G32440
AT4G32620
AT4G32660
AT4G32730
AT4G32750
AT4G32850
AT4G32940
AT4G32970
AT4G32980
AT4G33000
AT4G33100
AT4G33240
AT4G33500
AT4G33520
AT4G33625
AT4G33630
AT4G33700
AT4G33740
AT4G33760
AT4G33910
AT4G33920
AT4G34020
AT4G34100
AT4G34140
AT4G34215
AT4G34220
AT4G34240
AT4G34265
AT4G34370
AT4G34480
AT4G34570
AT4G34610
AT4G34680
AT4G34730
AT4G34900
AT4G35140
AT4G35300
AT4G35440
AT4G35450
AT4G35470
AT4G35560
AT4G35780
AT4G35785
AT4G35790
AT4G35800
AT4G35900
AT4G35920
AT4G36050
AT4G36190
AT4G36400
AT4G36480
AT4G36515
AT4G36648
AT4G36690
AT4G36790
AT4G36860
AT4G36960
AT4G37180
AT4G37310
AT4G37432
AT4G37480
AT4G37520
AT4G37550
AT4G37560
AT4G37630
AT4G37670
AT4G37680
AT4G38040
AT4G38060
AT4G38090
AT4G38120
AT4G38160
AT4G38225
AT4G38240
AT4G38330
AT4G38480
AT4G38510
AT4G38600
AT4G38670
AT4G38950
AT4G38960
AT4G39100
AT4G39140
AT4G39180
AT4G39260
AT4G39270
AT4G39540
AT4G39560
AT4G39710
AT5G01030
AT5G01290
AT5G01450
AT5G01510
AT5G01660
AT5G01770
AT5G01780
AT5G01950
AT5G01960
AT5G01970
AT5G02080
AT5G02100
AT5G02150
AT5G02200
AT5G02250
AT5G02520
AT5G02650
AT5G02810
AT5G02880
AT5G02910
AT5G02940
AT5G03180
AT5G03406
AT5G03440
AT5G03500
AT5G03560
AT5G03650
AT5G03730
AT5G03780
AT5G03830
AT5G04070
AT5G04250
AT5G04280
AT5G04420
AT5G04430
AT5G04460
AT5G04490
AT5G04510
AT5G04690
AT5G04800
AT5G04880
AT5G05140
AT5G05460
AT5G05550
AT5G05610
AT5G05800
AT5G05930
AT5G05970
AT5G06120
AT5G06265
AT5G06280
AT5G06350
AT5G06440
AT5G06690
AT5G06710
AT5G07350
AT5G07370
AT5G07630
AT5G07770
AT5G07890
AT5G08130
AT5G08139
AT5G08185
AT5G08370
AT5G08430
AT5G08450
AT5G08500
AT5G08560
AT5G08740
AT5G09230
AT5G09270
AT5G09300
AT5G09330
AT5G09410
AT5G09820
AT5G09850
AT5G09860
AT5G09880
AT5G09995
AT5G10060
AT5G10070
AT5G10350
AT5G10490
AT5G10540
AT5G10630
AT5G10650
AT5G10690
AT5G10940
AT5G11010
AT5G11030
AT5G11040
AT5G11170
AT5G11330
AT5G11350
AT5G11580
AT5G11600
AT5G11650
AT5G11720
AT5G11850
AT5G12170
AT5G12230
AT5G12240
AT5G12260
AT5G12840
[truncated: 444 more rows]

## Sheet: DB
Supplemental Table 5: Chromatin modifier genes (DB) extracted from the ChromDB database
516
AT1G01040
AT1G01370
AT1G01920
AT1G02580
AT1G02670
AT1G02740
AT1G03750
AT1G04050
AT1G04880
AT1G05120
AT1G05460
AT1G05490
AT1G05830
AT1G05900
AT1G05910
AT1G06230
AT1G06760
AT1G07660
AT1G07790
AT1G07820
AT1G08060
AT1G08170
AT1G08460
AT1G08600
AT1G08620
AT1G08880
AT1G09060
AT1G09200
AT1G09700
AT1G11100
AT1G11950
AT1G13180
AT1G13370
AT1G14030
AT1G14400
AT1G14790
AT1G14900
AT1G15340
AT1G16690
AT1G16710
AT1G17520
AT1G17770
AT1G17790
AT1G18100
AT1G18450
AT1G18800
AT1G19480
AT1G19890
AT1G20670
AT1G20693
AT1G20696
AT1G20910
AT1G21700
AT1G21710
AT1G22130
AT1G22310
AT1G22590
AT1G24190
AT1G24260
AT1G25440
AT1G26310
AT1G26760
AT1G28050
AT1G30810
AT1G31140
AT1G31280
AT1G31290
AT1G31630
AT1G31640
AT1G31814
AT1G32750
AT1G33070
AT1G43245
AT1G45000
AT1G48310
AT1G48410
AT1G48620
AT1G49130
AT1G49475
AT1G49480
AT1G49950
AT1G50410
AT1G51060
AT1G51450
AT1G52740
AT1G54260
AT1G54390
AT1G54690
AT1G55650
AT1G55970
AT1G58025
AT1G61040
AT1G61140
AT1G61215
AT1G62310
AT1G62830
AT1G63020
AT1G63210
AT1G63490
AT1G65300
AT1G65330
AT1G65440
AT1G65470
AT1G65480
AT1G66740
AT1G67220
AT1G68520
AT1G69120
AT1G69440
AT1G69770
AT1G70060
AT1G71692
AT1G72740
AT1G73100
AT1G73150
AT1G73870
AT1G73910
AT1G74560
AT1G75230
AT1G75600
AT1G75610
AT1G76110
AT1G76380
AT1G76510
AT1G76710
AT1G77080
AT1G77300
AT1G78280
AT1G79000
AT1G79020
AT1G79730
AT1G80740
AT2G02090
AT2G02760
AT2G03710
AT2G05900
AT2G06210
AT2G13370
AT2G14210
AT2G15030
AT2G15660
AT2G16390
AT2G16780
AT2G17410
AT2G17560
AT2G17900
AT2G18000
AT2G18050
AT2G18760
AT2G18880
AT2G19480
AT2G19520
AT2G19640
AT2G19670
AT2G19910
AT2G19920
AT2G19930
AT2G21450
AT2G22540
AT2G22630
AT2G22720
AT2G22740
AT2G23380
AT2G23740
AT2G24740
AT2G24790
AT2G25170
AT2G26880
AT2G27040
AT2G27170
AT2G27550
AT2G27840
AT2G27880
AT2G28290
AT2G28380
AT2G28700
AT2G28720
AT2G28740
AT2G30620
AT2G31450
AT2G31650
AT2G32590
AT2G32940
AT2G33290
AT2G33500
AT2G33610
AT2G34210
AT2G34450
AT2G34880
AT2G34900
AT2G35160
AT2G35670
AT2G36490
AT2G37470
AT2G38810
AT2G38950
AT2G40030
AT2G40210
AT2G40770
AT2G42150
AT2G42830
AT2G44150
AT2G44430
AT2G44950
AT2G44980
AT2G45640
AT2G45650
AT2G45660
AT2G46020
AT2G46040
AT2G47210
AT2G47410
AT2G47620
AT2G47890
AT3G01320
AT3G01460
AT3G01770
AT3G01890
AT3G02310
AT3G02380
AT3G03300
AT3G03750
AT3G04380
AT3G05860
AT3G06010
AT3G06400
AT3G06930
AT3G07610
AT3G07650
AT3G07740
AT3G07930
AT3G09480
AT3G10010
AT3G10390
AT3G12270
AT3G12380
AT3G12810
AT3G12980
AT3G13350
AT3G13682
AT3G13782
AT3G15790
AT3G16600
AT3G17310
AT3G17590
AT3G18090
AT3G18520
AT3G18960
AT3G18990
AT3G19040
AT3G19210
AT3G20010
AT3G20670
AT3G20740
AT3G20810
AT3G21060
AT3G21820
AT3G21880
AT3G22440
AT3G22590
AT3G23780
AT3G24010
AT3G24340
AT3G24440
AT3G26932
AT3G27000
AT3G27260
AT3G27360
AT3G28730
AT3G30260
AT3G33520
AT3G42670
AT3G43240
AT3G43920
AT3G44490
AT3G44530
AT3G44660
AT3G44680
AT3G44750
AT3G45930
AT3G45980
AT3G46030
AT3G46320
AT3G46580
AT3G47460
AT3G48430
AT3G48710
AT3G49500
AT3G49660
AT3G49850
AT3G50880
AT3G51880
AT3G52280
AT3G53650
AT3G53730
AT3G54280
AT3G54340
AT3G54460
AT3G54560
AT3G54610
AT3G54670
AT3G57060
AT3G57230
AT3G57300
AT3G57390
AT3G57980
AT3G58780
AT3G59960
AT3G60110
AT3G60830
AT3G61120
AT3G61740
AT3G62800
AT3G63030
AT4G00416
AT4G00650
AT4G00990
AT4G01580
AT4G02020
AT4G02730
AT4G04260
AT4G08350
AT4G08990
AT4G09960
AT4G10670
AT4G10710
AT4G11080
AT4G11130
AT4G11400
AT4G11880
AT4G12740
AT4G13460
AT4G13570
AT4G13610
AT4G14140
AT4G14900
AT4G15180
AT4G15250
AT4G16310
AT4G16420
AT4G16570
AT4G16845
AT4G18960
AT4G19020
AT4G20370
AT4G20400
AT4G20910
AT4G20920
AT4G21430
AT4G22140
AT4G22745
AT4G22950
AT4G23800
AT4G24540
AT4G26110
AT4G27230
AT4G27910
AT4G29510
AT4G29730
AT4G30200
AT4G30860
AT4G31120
AT4G31900
AT4G33280
AT4G33470
AT4G34060
AT4G34430
AT4G35050
AT4G35570
AT4G37280
AT4G37860
AT4G37940
AT4G38130
AT4G39100
AT4G40030
AT4G40040
AT5G02560
AT5G02570
AT5G03740
AT5G03840
AT5G04240
AT5G04560
AT5G04940
AT5G05130
AT5G06500
AT5G06550
AT5G06620
AT5G07810
AT5G08565
AT5G08630
AT5G08780
AT5G09230
AT5G09740
AT5G09790
AT5G10140
AT5G10390
AT5G10400
AT5G10550
AT5G10980
AT5G12910
AT5G13790
AT5G13960
AT5G14170
AT5G14270
AT5G14530
AT5G14620
AT5G15020
AT5G15380
AT5G15800
AT5G15840
AT5G15850
AT5G16320
AT5G17240
AT5G17690
AT5G18620
AT5G19310
AT5G19840
AT5G19990
AT5G20000
AT5G20240
AT5G20320
AT5G20420
AT5G21030
AT5G21150
AT5G22330
AT5G22650
AT5G22750
AT5G22880
AT5G23260
AT5G23405
AT5G23420
AT5G23570
AT5G24330
AT5G24930
AT5G25150
AT5G25480
AT5G26040
AT5G26580
AT5G26650
AT5G27220
AT5G27230
AT5G27670
AT5G27810
AT5G27960
AT5G35330
AT5G35338
AT5G35600
AT5G37630
AT5G38110
AT5G41070
AT5G42400
AT5G43010
AT5G43500
AT5G43530
AT5G43810
AT5G43990
AT5G44800
AT5G45600
AT5G46550
AT5G46910
AT5G48250
AT5G48385
AT5G48600
AT5G48670
AT5G49020
AT5G49160
AT5G49430
AT5G50320
AT5G51230
AT5G51860
AT5G51870
AT5G52230
AT5G53430
AT5G54640
AT5G55040
AT5G55760
AT5G56180
AT5G56740
AT5G56950
AT5G57380
AT5G57660
AT5G58230
AT5G59380
AT5G59690
AT5G59800
AT5G59870
AT5G59910
AT5G59970
AT5G60910
AT5G61060
AT5G61070
AT5G61150
AT5G61850
AT5G62040
AT5G62165
AT5G62410
AT5G62540
AT5G63080
AT5G63110
AT5G63330
AT5G63550
AT5G63670
AT5G63950
AT5G64610
AT5G64630
AT5G65050
AT5G65060
AT5G65070
AT5G65080
AT5G65350
AT5G65360
AT5G65630
AT5G66240
AT5G66750
AT5G67580
AT5G67630

## Sheet: RT
Supplemental Table 5: Genes present on the RT-qPCR platform (RT)
144
AT1G01040
AT1G01370
AT1G03770
AT1G05830
AT1G06760
AT1G06770
AT1G08620
AT1G09060
AT1G09200
AT1G11950
AT1G13220
AT1G13370
AT1G14510
AT1G15940
AT1G19890
AT1G21700
AT1G30810
AT1G48410
AT1G49480
AT1G49950
AT1G51060
AT1G51745
AT1G52740
AT1G57820
AT1G62310
AT1G62830
AT1G63490
AT1G65470
AT1G67230
AT1G68790
AT1G69770
AT1G75600
AT1G78280
AT1G79350
AT1G80740
AT1G80810
AT2G02470
AT2G16780
AT2G18050
AT2G18870
AT2G18880
AT2G19520
AT2G20825
AT2G23380
AT2G27040
AT2G27100
AT2G28290
AT2G30470
AT2G30580
AT2G30620
AT2G31650
AT2G33610
AT2G34880
AT2G36490
AT2G38810
AT2G38950
AT2G40930
AT2G46020
AT2G47620
AT3G03140
AT3G03300
AT3G06010
AT3G06400
AT3G07610
AT3G10010
AT3G10390
AT3G10730
AT3G11200
AT3G13682
AT3G17310
AT3G18990
AT3G20670
AT3G20740
AT3G20810
AT3G21295
AT3G23060
AT3G23980
AT3G24440
AT3G42790
AT3G43920
AT3G44750
AT3G45880
AT3G48430
AT3G49850
AT3G54560
AT3G61740
AT4G00990
AT4G02020
AT4G06634
AT4G16310
AT4G16420
AT4G16845
AT4G19020
AT4G20400
AT4G21430
AT4G21550
AT4G27230
AT4G27910
AT4G28190
AT4G29730
AT4G30200
AT4G31880
AT4G32010
AT4G34060
AT4G35050
AT4G40030
AT4G40040
AT5G02560
AT5G03740
AT5G04240
AT5G04560
AT5G04990
AT5G05610
AT5G06550
AT5G09740
AT5G10390
AT5G10980
AT5G12910
AT5G14170
AT5G14620
AT5G15380
AT5G18620
AT5G20320
AT5G20510
AT5G22030
AT5G26210
AT5G27670
AT5G39550
AT5G44280
AT5G46910
AT5G47690
AT5G49160
AT5G51230
AT5G53430
AT5G54640
AT5G57380
AT5G58230
AT5G59870
AT5G63080
AT5G64610
AT5G64630
AT5G65350
AT5G65360
AT5G65770

## Sheet: DE-DAS
Supplemental Table 5: Overlap of genes induced or repressed (DE) and alternatively spliced (DAS) during cold exposure based on published data (Calixto et al., 2018)
795
AT1G01060
AT1G01448
AT1G01770
AT1G02205
AT1G02300
AT1G02500
AT1G02930
AT1G03030
AT1G03055
AT1G03090
AT1G03210
AT1G03310
AT1G03370
AT1G03410
AT1G03610
AT1G03905
AT1G04350
AT1G05320
AT1G05540
AT1G05630
AT1G05870
AT1G06040
AT1G06220
AT1G06645
AT1G07350
AT1G07570
AT1G07640
AT1G08900
AT1G09140
AT1G09530
AT1G09710
AT1G10050
AT1G10240
AT1G10360
AT1G10522
AT1G10600
AT1G10660
AT1G10900
AT1G10920
AT1G11330
AT1G11360
AT1G11785
AT1G12244
AT1G12650
AT1G12730
AT1G13410
AT1G13570
AT1G13800
AT1G13990
AT1G14030
AT1G14170
AT1G14350
AT1G15215
AT1G15400
AT1G15790
AT1G15960
AT1G16260
AT1G16570
AT1G16650
AT1G16820
AT1G17850
AT1G17990
AT1G18090
AT1G18460
AT1G18650
AT1G18660
AT1G18750
AT1G18773
AT1G18800
AT1G19000
AT1G19394
AT1G19660
AT1G19690
AT1G19720
AT1G19860
AT1G20100
AT1G20560
AT1G21400
AT1G21560
AT1G21840
AT1G22330
AT1G22370
AT1G22400
AT1G22430
AT1G23080
AT1G24148
AT1G24265
AT1G24793
AT1G24825
AT1G25098
AT1G25175
AT1G25230
AT1G26100
AT1G26230
AT1G26440
AT1G26580
AT1G27420
AT1G27540
AT1G27630
AT1G28100
AT1G28210
AT1G28330
AT1G28395
AT1G28580
AT1G28610
AT1G28960
AT1G29357
AT1G29400
AT1G29410
AT1G30200
AT1G30910
AT1G31540
AT1G31550
AT1G32540
AT1G32700
AT1G33240
AT1G33970
AT1G34315
AT1G34380
AT1G34640
AT1G34750
AT1G35516
AT1G35612
AT1G43580
AT1G44446
AT1G45249
AT1G47490
AT1G47520
AT1G47530
AT1G48030
AT1G48260
AT1G48430
AT1G48540
AT1G49180
AT1G49730
AT1G49975
AT1G50950
AT1G50970
AT1G51270
AT1G51430
AT1G52565
AT1G52710
AT1G53090
AT1G53510
AT1G53780
AT1G53800
AT1G54310
AT1G54390
AT1G54730
AT1G55000
AT1G55280
AT1G55310
AT1G55320
AT1G55690
AT1G56010
AT1G56280
AT1G56300
AT1G56660
AT1G56720
AT1G57600
AT1G58180
AT1G58200
AT1G58602
AT1G58807
AT1G59124
AT1G59620
AT1G59710
AT1G60260
AT1G60270
AT1G60505
AT1G61210
AT1G61340
AT1G61430
AT1G61500
AT1G62200
AT1G62250
AT1G62540
AT1G62560
AT1G62710
AT1G63100
AT1G63250
AT1G63260
AT1G63800
AT1G64270
AT1G65000
AT1G65040
AT1G65070
AT1G65120
AT1G66520
AT1G67850
AT1G68550
AT1G69310
AT1G69370
AT1G69450
AT1G69572
AT1G69610
AT1G69830
AT1G70610
AT1G70620
AT1G70820
AT1G71240
AT1G71340
AT1G72030
AT1G72320
AT1G72770
AT1G72855
AT1G73390
AT1G73470
AT1G73480
AT1G73650
AT1G73750
AT1G73920
AT1G74170
AT1G74300
AT1G74310
AT1G74700
AT1G75380
AT1G75860
AT1G76520
AT1G76570
AT1G76580
AT1G77320
AT1G77480
AT1G77810
AT1G78000
AT1G78070
AT1G78490
AT1G78510
AT1G78660
AT1G78680
AT1G78970
AT1G79190
AT1G79270
AT1G79380
AT1G79529
AT1G79740
AT1G79790
AT1G80150
AT1G80190
AT1G80270
AT1G80770
AT1G80780
AT1G80790
AT2G01420
AT2G02410
AT2G02710
AT2G02765
AT2G03530
AT2G04110
AT2G04690
AT2G05185
AT2G05632
AT2G06025
AT2G07042
AT2G07180
AT2G12400
AT2G14520
AT2G15580
AT2G16750
AT2G16990
AT2G17033
AT2G17560
AT2G17780
AT2G18230
AT2G18280
AT2G19250
AT2G20585
AT2G20770
AT2G21540
AT2G21660
AT2G21710
AT2G21830
AT2G22830
AT2G22970
AT2G22980
AT2G22990
AT2G23330
AT2G23420
AT2G24120
AT2G24150
AT2G24590
AT2G25590
AT2G25730
AT2G26200
AT2G26540
AT2G26980
AT2G27340
AT2G28570
AT2G28940
AT2G29310
AT2G29540
AT2G29630
AT2G29650
AT2G29670
AT2G30600
AT2G31560
AT2G31740
AT2G31751
AT2G31830
AT2G32010
AT2G32160
AT2G32530
AT2G32640
AT2G32870
AT2G33480
AT2G33760
AT2G34720
AT2G34780
AT2G34850
AT2G35390
AT2G35660
AT2G36000
AT2G36390
AT2G36792
AT2G37340
AT2G37540
AT2G37678
AT2G38550
AT2G38980
AT2G38995
AT2G39000
AT2G39130
AT2G39240
AT2G39470
AT2G39580
AT2G40020
AT2G40110
AT2G40460
AT2G40640
AT2G41100
AT2G41700
AT2G42170
AT2G42190
AT2G43010
AT2G43500
AT2G43920
AT2G44920
AT2G45010
AT2G45280
AT2G45380
AT2G45510
AT2G46270
AT2G46420
AT2G46535
AT2G46710
AT2G46730
AT2G46790
AT2G46810
AT2G46830
AT2G46970
AT2G47060
AT2G47370
AT2G47640
AT2G47820
AT2G47890
AT3G01360
AT3G01560
AT3G01650
AT3G01770
AT3G02150
AT3G02300
AT3G02380
AT3G02470
AT3G02690
AT3G02875
AT3G02920
AT3G02990
AT3G03020
AT3G03770
AT3G04160
AT3G04350
AT3G04485
AT3G05160
AT3G06500
AT3G06920
AT3G07200
AT3G07215
AT3G07530
AT3G07580
AT3G07770
AT3G09160
AT3G09470
AT3G09600
AT3G10150
AT3G10250
AT3G10260
AT3G10550
AT3G10690
AT3G11220
AT3G11290
AT3G12150
AT3G12340
AT3G12820
AT3G12990
AT3G13030
AT3G13062
AT3G13440
AT3G13570
AT3G14150
AT3G14930
AT3G15354
AT3G15395
AT3G16700
AT3G16800
AT3G16840
AT3G16857
AT3G17100
AT3G17360
AT3G17609
AT3G17830
AT3G17910
AT3G17950
AT3G18090
AT3G18100
AT3G18270
AT3G19000
AT3G19820
AT3G20120
AT3G20810
AT3G21110
AT3G21230
AT3G21300
AT3G21390
AT3G21755
AT3G22150
AT3G22235
AT3G22420
AT3G23210
AT3G23640
AT3G23820
AT3G24840
AT3G25150
AT3G26100
AT3G26510
AT3G26690
AT3G26890
AT3G26932
AT3G27900
AT3G27940
AT3G28070
AT3G28080
AT3G28100
AT3G28130
AT3G28956
AT3G29100
AT3G29240
AT3G44400
AT3G45443
AT3G45860
AT3G46130
AT3G46210
AT3G46385
AT3G46490
AT3G46640
AT3G46780
AT3G46950
AT3G47500
AT3G47560
AT3G49140
AT3G49410
AT3G49500
AT3G49590
AT3G50880
AT3G52072
AT3G52180
AT3G52660
AT3G52720
AT3G52840
AT3G53170
AT3G53500
AT3G53800
AT3G53830
AT3G54480
AT3G54500
AT3G54910
AT3G55260
AT3G55290
AT3G55630
AT3G56160
AT3G57062
AT3G57410
AT3G57470
AT3G57680
AT3G57770
AT3G58670
AT3G58900
AT3G59210
AT3G59300
AT3G59310
AT3G59320
AT3G59350
AT3G59570
AT3G59780
AT3G60500
AT3G60910
AT3G61010
AT3G61160
AT3G61370
AT3G62310
AT3G62330
AT3G62370
AT3G62390
AT3G62750
AT3G62860
AT3G63530
AT4G00050
AT4G00560
AT4G00955
AT4G01026
AT4G01510
AT4G01593
AT4G01600
AT4G01915
AT4G02430
AT4G02540
AT4G03230
AT4G03935
AT4G04200
AT4G04350
AT4G04740
AT4G04750
AT4G07410
AT4G07507
AT4G09020
AT4G10120
AT4G10770
AT4G11840
AT4G11900
AT4G11960
AT4G12030
AT4G12460
AT4G12750
AT4G13495
AT4G13800
AT4G14300
AT4G14550
AT4G14880
AT4G15430
AT4G15510
AT4G15540
AT4G16710
AT4G16770
AT4G16857
AT4G16960
AT4G17310
AT4G17790
AT4G18270
AT4G18975
AT4G19160
AT4G19550
AT4G19985
AT4G19990
AT4G20070
AT4G20440
AT4G21090
AT4G21770
AT4G21910
AT4G22270
AT4G22970
AT4G23290
AT4G23860
AT4G23990
AT4G24350
AT4G24520
AT4G25080
AT4G25315
AT4G25450
AT4G25500
AT4G25640
AT4G25707
AT4G25770
AT4G26070
AT4G26140
AT4G26255
AT4G26400
AT4G26520
AT4G26530
AT4G26555
AT4G26795
AT4G26860
AT4G27270
AT4G27490
AT4G27745
AT4G27780
AT4G27820
AT4G27860
AT4G28900
AT4G29890
AT4G30690
AT4G30720
AT4G30993
AT4G31050
AT4G31115
AT4G31240
AT4G31870
AT4G32060
AT4G32440
AT4G32980
AT4G33000
AT4G33500
AT4G33760
AT4G33920
AT4G34215
AT4G34220
AT4G34265
AT4G34610
AT4G34680
AT4G34730
AT4G34900
AT4G35300
AT4G35440
AT4G37480
AT4G37520
AT4G37550
AT4G37670
AT4G37680
AT4G38090
AT4G38670
AT4G38960
AT4G39180
AT4G39260
AT4G39710
AT5G01290
AT5G01450
AT5G01660
AT5G02150
AT5G02200
AT5G02810
AT5G02880
AT5G02940
AT5G03830
AT5G04250
AT5G04280
AT5G04490
AT5G04690
AT5G04800
AT5G04880
AT5G05460
AT5G05550
AT5G05800
AT5G06690
AT5G06710
AT5G07770
AT5G08185
AT5G09270
AT5G09300
AT5G10070
AT5G10630
AT5G11330
AT5G11650
AT5G13690
AT5G13730
AT5G13800
AT5G14060
AT5G14080
AT5G14260
AT5G14440
AT5G14660
AT5G14960
AT5G17010
AT5G17240
AT5G17300
AT5G17880
AT5G18100
AT5G18245
AT5G18540
AT5G18630
AT5G18640
AT5G18780
AT5G18820
AT5G18850
AT5G19850
AT5G20380
AT5G20450
AT5G21100
AT5G21170
AT5G21930
AT5G22050
AT5G22300
AT5G22700
AT5G22710
AT5G23050
AT5G23240
AT5G23510
AT5G23690
AT5G24000
AT5G24318
AT5G24670
AT5G24680
AT5G24735
AT5G25630
AT5G26180
AT5G26600
AT5G26680
AT5G26980
AT5G27400
AT5G27680
AT5G27710
AT5G27730
AT5G27950
AT5G28020
AT5G28770
AT5G28830
AT5G35170
AT5G36220
AT5G36930
AT5G37130
AT5G37260
AT5G37590
AT5G37930
AT5G38140
AT5G38240
AT5G38720
AT5G39530
AT5G39790
AT5G40500
AT5G40820
AT5G41612
AT5G42730
AT5G43440
AT5G43725
AT5G43850
AT5G44520
AT5G44530
AT5G44600
AT5G44730
AT5G45040
AT5G45140
AT5G45780
AT5G45920
AT5G46150
AT5G46280
AT5G46470
AT5G46490
AT5G46500
AT5G47455
AT5G48220
AT5G48640
AT5G48790
AT5G48880
AT5G49730
AT5G49740
AT5G50280
AT5G50840
AT5G50950
AT5G51460
AT5G51710
AT5G51720
AT5G53450
AT5G54130
AT5G54250
AT5G55790
AT5G56850
AT5G57150
AT5G57565
AT5G57630
AT5G58200
AT5G58350
AT5G58370
AT5G58470
AT5G58600
AT5G58940
AT5G59050
AT5G59130
AT5G59400
AT5G59480
AT5G59570
AT5G59670
AT5G59780
AT5G59960
AT5G59980
AT5G60100
AT5G60430
AT5G60540
AT5G61010
AT5G61270
AT5G61380
AT5G62130
AT5G62270
AT5G62720
AT5G62980
AT5G63120
AT5G63770
AT5G64000
AT5G64170
AT5G64360
AT5G65060
AT5G65400
AT5G65940
AT5G66420
AT5G66530
AT5G66610
AT5G66880
AT5G67140
AT5G67370

## Sheet: DE-DB
Supplemental Table 5: Overlap of genes induced or repressed during cold exposure (DE), based on published data (Calixto et al., 2018) and present on the ChromDB database (DB)
103
AT1G02670
AT1G05910
AT1G08460
AT1G09200
AT1G13370
AT1G14030
AT1G14790
AT1G14900
AT1G18100
AT1G18800
AT1G20693
AT1G20696
AT1G20910
AT1G25440
AT1G43245
AT1G49130
AT1G49480
AT1G54390
AT1G54690
AT1G65300
AT1G68520
AT1G69440
AT1G73870
AT1G74560
AT2G15030
AT2G16390
AT2G17560
AT2G18000
AT2G18050
AT2G19480
AT2G19640
AT2G19670
AT2G19920
AT2G19930
AT2G24790
AT2G27840
AT2G28720
AT2G34450
AT2G35160
AT2G36490
AT2G42150
AT2G44430
AT2G45660
AT2G46040
AT2G47890
AT3G01770
AT3G02380
AT3G07650
AT3G10010
AT3G12270
AT3G12810
AT3G13782
AT3G18090
AT3G18960
AT3G19210
AT3G20810
AT3G26932
AT3G43920
AT3G44750
AT3G46320
AT3G49500
AT3G49660
AT3G50880
AT3G53650
AT3G54460
AT4G08990
AT4G12740
AT4G13570
AT4G14900
AT4G16570
AT4G20370
AT4G29510
AT4G31120
AT4G34060
AT4G35050
AT4G38130
AT5G02560
AT5G02570
AT5G06550
AT5G07810
AT5G15800
AT5G15840
AT5G15850
AT5G17240
AT5G20320
AT5G20420
AT5G22330
AT5G22650
AT5G22880
AT5G24330
AT5G27220
AT5G43810
AT5G48250
AT5G50320
AT5G55760
AT5G56740
AT5G56950
AT5G57660
AT5G59870
AT5G62040
AT5G65060
AT5G65350
AT5G67630

## Sheet: DE-RT
Supplemental Table 5: Overlap of genes induced or repressed during cold exposure (DE), based on published data (Calixto et al., 2018) and present on the RT-qPCR platform (RT)
20
AT1G09200
AT1G13370
AT1G49480
AT2G18050
AT2G36490
AT3G10010
AT3G20810
AT3G43920
AT3G44750
AT3G45880
AT4G28190
AT4G34060
AT4G35050
AT5G02560
AT5G06550
AT5G20320
AT5G44280
AT5G59870
AT5G65350
AT5G65770

## Sheet: DAS-DB
Supplemental Table 5: Overlap of genes alternatively spliced during cold exposure (DAS), based on published data (Calixto et al., 2018) and present on the ChromDB database (DB)
67
AT1G01920
AT1G05830
AT1G05900
AT1G06230
AT1G07820
AT1G08060
AT1G08620
AT1G14030
AT1G17520
AT1G18800
AT1G22310
AT1G48310
AT1G48410
AT1G54390
AT1G63490
AT1G72740
AT1G75230
AT1G77080
AT1G79000
AT1G79020
AT2G03710
AT2G17560
AT2G18760
AT2G28290
AT2G44150
AT2G44950
AT2G47210
AT2G47410
AT2G47890
AT3G01770
AT3G02380
AT3G07930
AT3G10390
AT3G17310
AT3G18090
AT3G20810
AT3G24440
AT3G26932
AT3G27000
AT3G27260
AT3G44680
AT3G49500
AT3G50880
AT3G57300
AT3G57980
AT4G02020
AT4G10710
AT4G16420
AT4G16845
AT4G30200
AT4G39100
AT5G09230
AT5G14270
AT5G17240
AT5G18620
AT5G41070
AT5G42400
AT5G43500
AT5G43990
AT5G51230
AT5G55040
AT5G56180
AT5G63080
AT5G63550
AT5G65050
AT5G65060
AT5G66240

## Sheet: DAS-RT
Supplemental Table 5: Overlap of genes alternatively spliced during cold exposure (DAS), based on published data (Calixto et al., 2018) and present on the RT-qPCR platform (RT)
23
AT1G05830
AT1G06770
AT1G08620
AT1G48410
AT1G63490
AT2G02470
AT2G28290
AT3G10390
AT3G17310
AT3G20810
AT3G23980
AT3G24440
AT4G02020
AT4G16420
AT4G16845
AT4G30200
AT4G32010
AT5G05610
AT5G18620
AT5G22030
AT5G47690
AT5G51230
AT5G63080

## Sheet: DB-RT
Supplemental Table 5: Overlap of genes present on the ChromDB database (DB) and the RT-qPCR platform (RT)
104
AT1G01040
AT1G01370
AT1G05830
AT1G06760
AT1G08620
AT1G09060
AT1G09200
AT1G11950
AT1G13370
AT1G19890
AT1G21700
AT1G30810
AT1G48410
AT1G49480
AT1G49950
AT1G51060
AT1G52740
AT1G62310
AT1G62830
AT1G63490
AT1G65470
AT1G69770
AT1G75600
AT1G78280
AT1G80740
AT2G16780
AT2G18050
AT2G18880
AT2G19520
AT2G23380
AT2G27040
AT2G28290
AT2G30620
AT2G31650
AT2G33610
AT2G34880
AT2G36490
AT2G38810
AT2G38950
AT2G46020
AT2G47620
AT3G03300
AT3G06010
AT3G06400
AT3G07610
AT3G10010
AT3G10390
AT3G13682
AT3G17310
AT3G18990
AT3G20670
AT3G20740
AT3G20810
AT3G24440
AT3G43920
AT3G44750
AT3G48430
AT3G49850
AT3G54560
AT3G61740
AT4G00990
AT4G02020
AT4G16310
AT4G16420
AT4G16845
AT4G19020
AT4G20400
AT4G21430
AT4G27230
AT4G27910
AT4G29730
AT4G30200
AT4G34060
AT4G35050
AT4G40030
AT4G40040
AT5G02560
AT5G03740
AT5G04240
AT5G04560
AT5G06550
AT5G09740
AT5G10390
AT5G10980
AT5G12910
AT5G14170
AT5G14620
AT5G15380
AT5G18620
AT5G20320
AT5G27670
AT5G46910
AT5G49160
AT5G51230
AT5G53430
AT5G54640
AT5G57380
AT5G58230
AT5G59870
AT5G63080
AT5G64610
AT5G64630
AT5G65350
AT5G65360

[truncated: 4 more sheets: DE-DAS-DB, DE-DAS-RT, DAS-DB-RT, DE-DAS-DB-RT]
